# Supplementary material for: Slow presynaptic mechanisms that mediate adaptation in the olfactory pathway of Drosophila
Source: eLife journal article supplement (doi:10.7554/elife.43735), 2019-06-06
Supplement: supp [file elife-43735-supp-v2.zip]

Archive with 11 entries (11 files):
- elife_poa_e43735_Figure_3_figure_supplement_1.pdf
- elife_poa_e43735_Figure_7_figure_supplement_1.pdf
- elife_poa_e43735_Figure_5_figure_supplement_1.pdf
- elife_poa_e43735_Transparent_Reporting_File.pdf
- elife_poa_e43735_Figure_1_figure_supplement_1.pdf
- elife_poa_e43735_Figure_6_figure_supplement_1.pdf
- elife_poa_e43735_Figure_7_figure_supplement_2.pdf
- elife_poa_e43735_Figure_6_figure_supplement_2.pdf
- elife_poa_e43735_Figure_4_figure_supplement_1.tif
- elife_poa_e43735_Figure_8_figure_supplement_1.pdf
- elife_poa_e43735_Figure_1_figure_supplement_2.pdf
