# Supplementary figures and images for: Slow presynaptic mechanisms that mediate adaptation in the olfactory pathway of Drosophila
Source: eLife journal article supplement (doi:10.7554/elife.43735), 2019-06-06

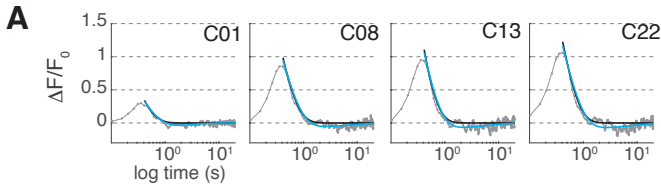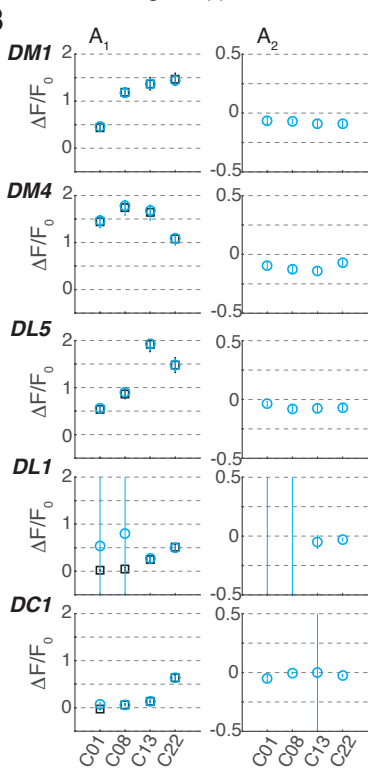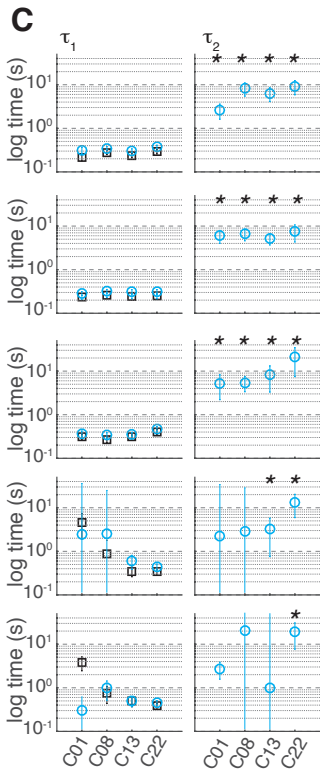

Supplement: supp [file elife-43735-supp-v1.zip]

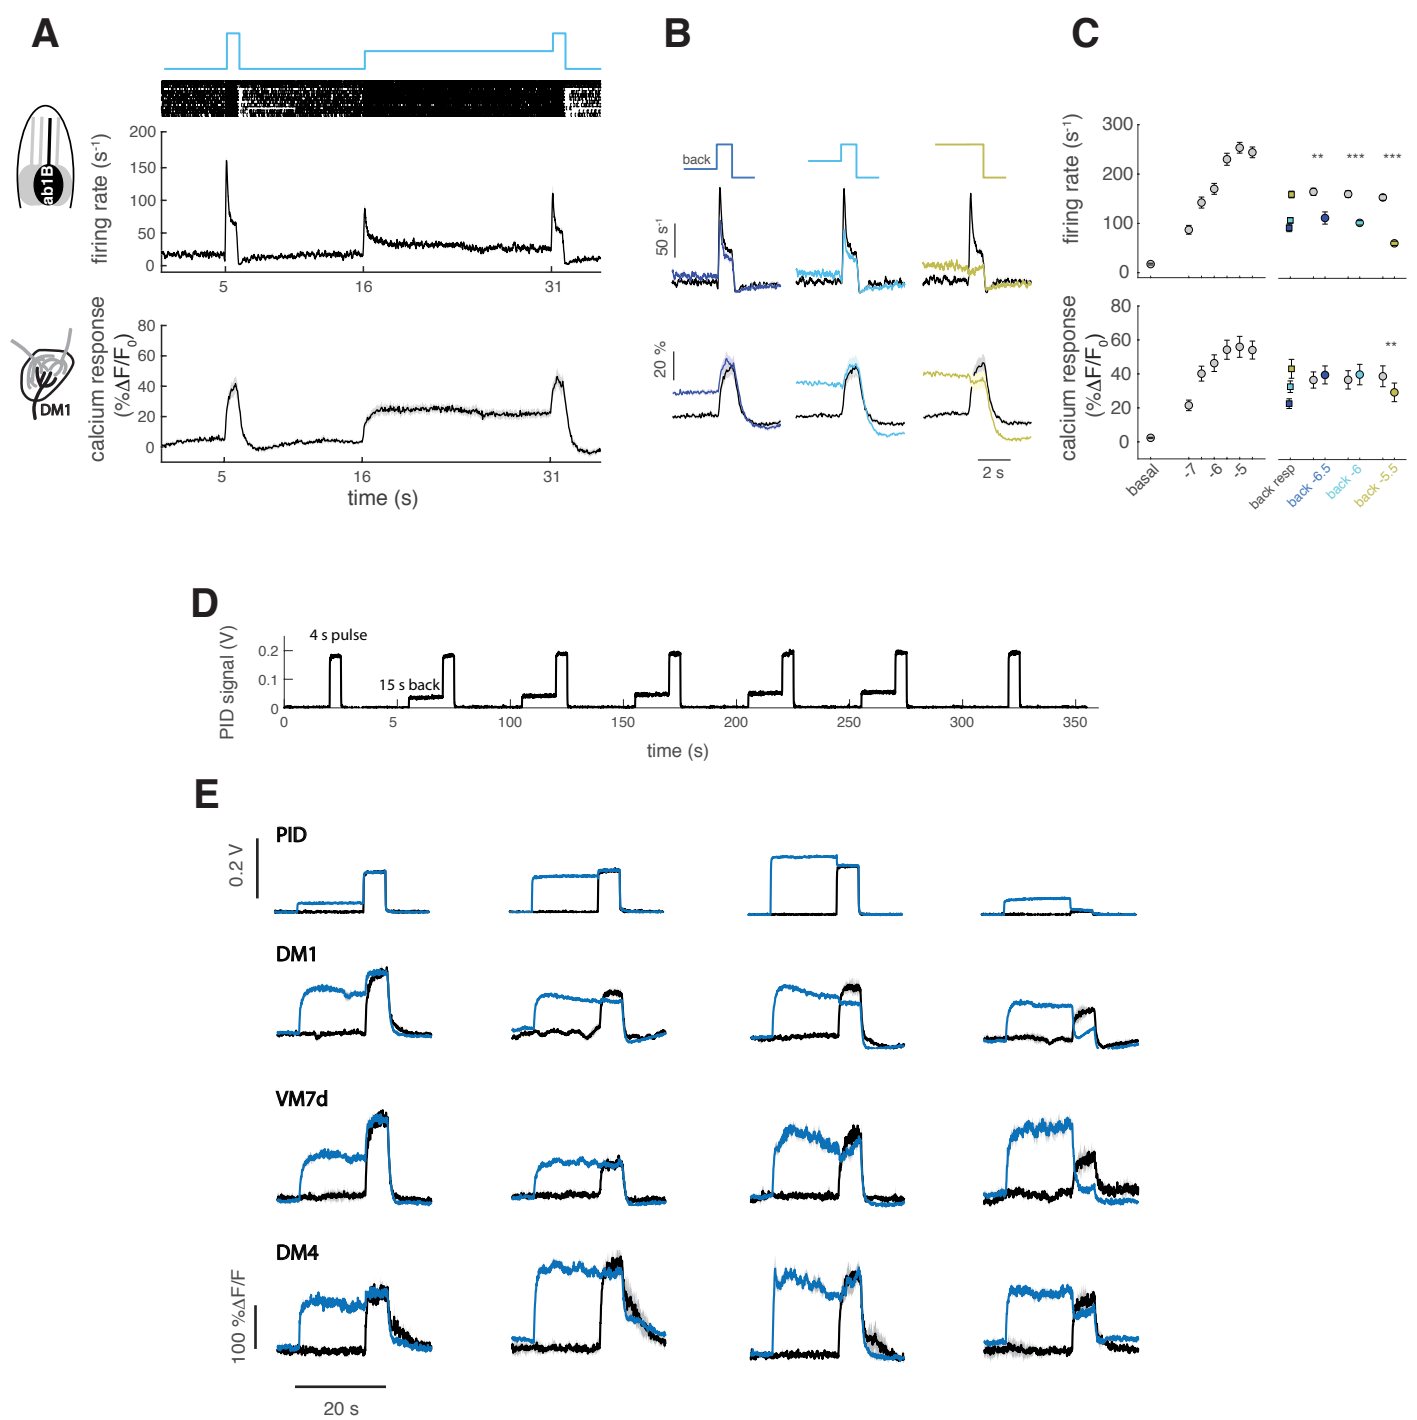

Supplement: supp [file elife-43735-supp-v1.zip]

**A**

methyl acetate

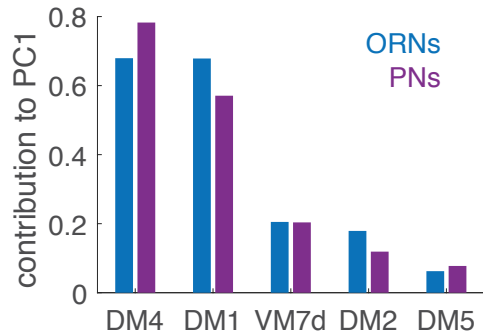**B**

benzaldehyde

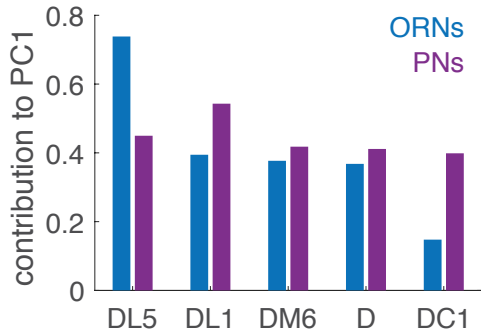

Supplement: supp [file elife-43735-supp-v1.zip]

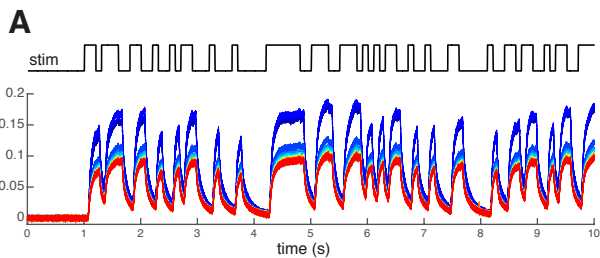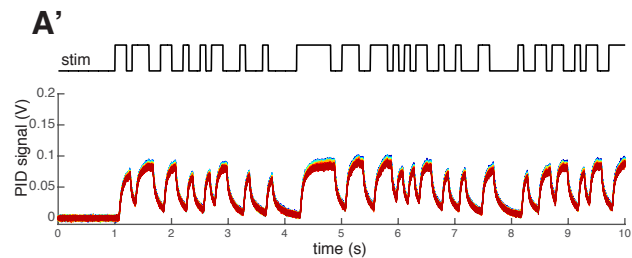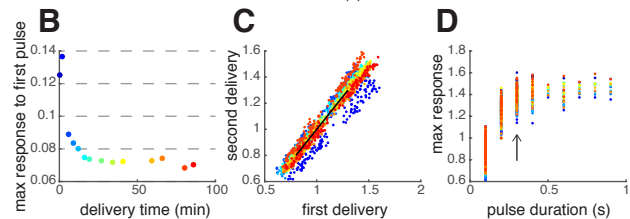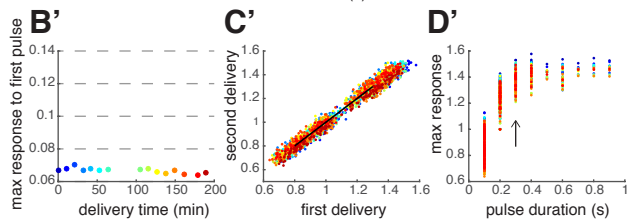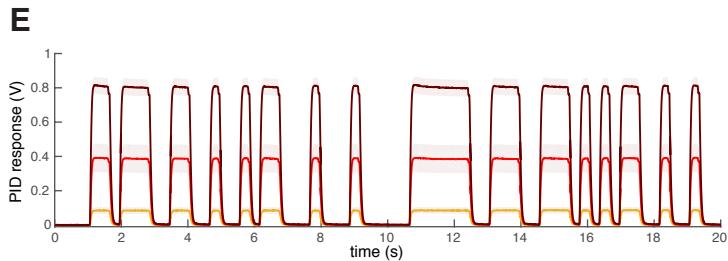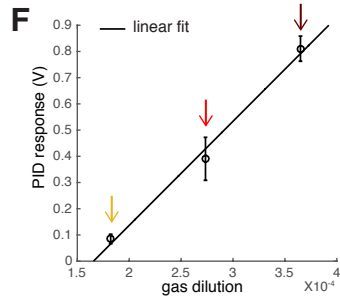

Supplement: supp [file elife-43735-supp-v1.zip]

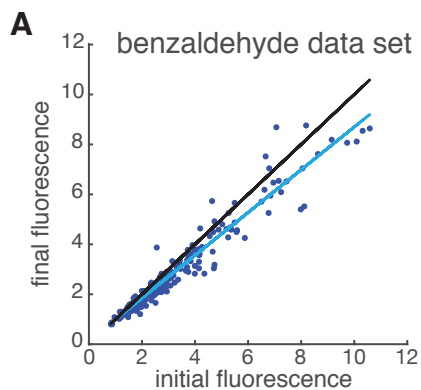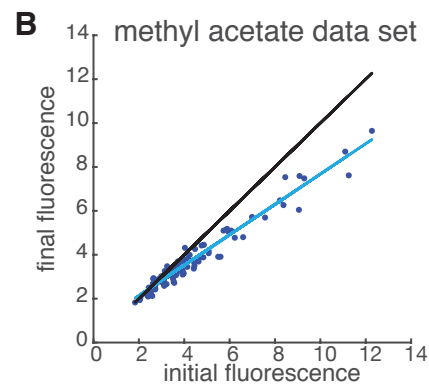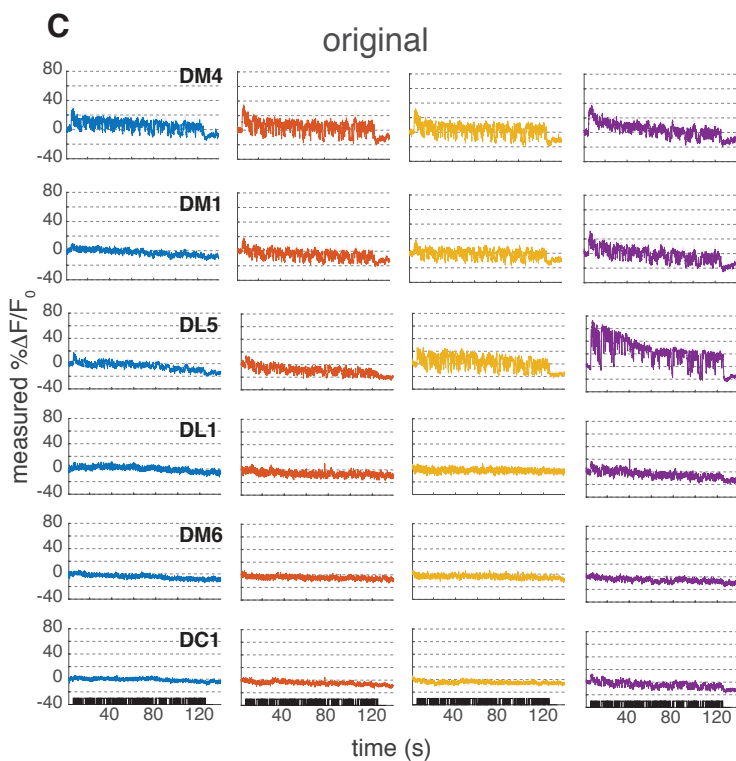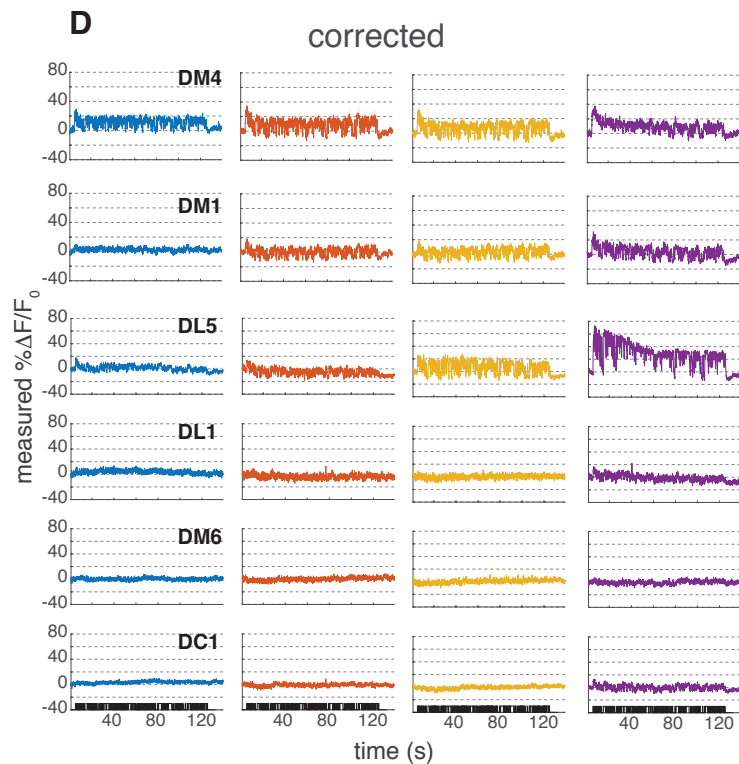

Supplement: supp [file elife-43735-supp-v1.zip]

# ORNs

**A**

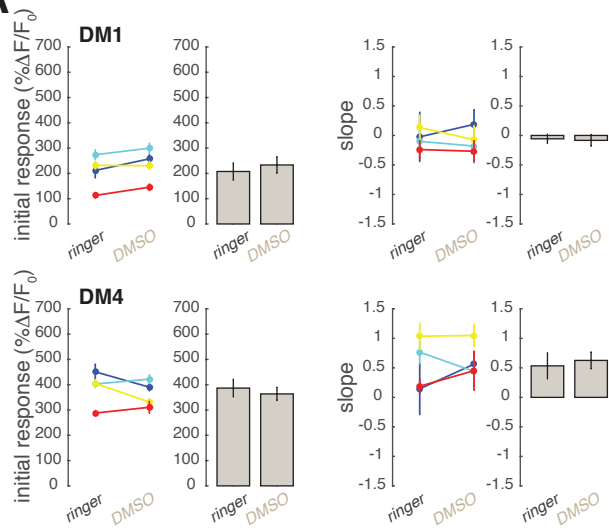

**B**

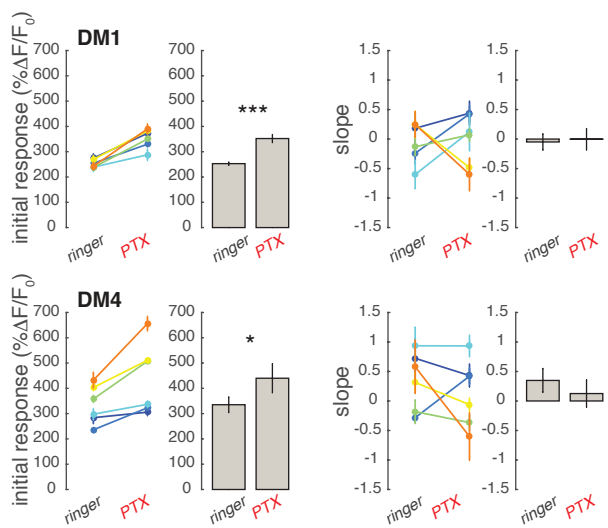

# PNs

**C**

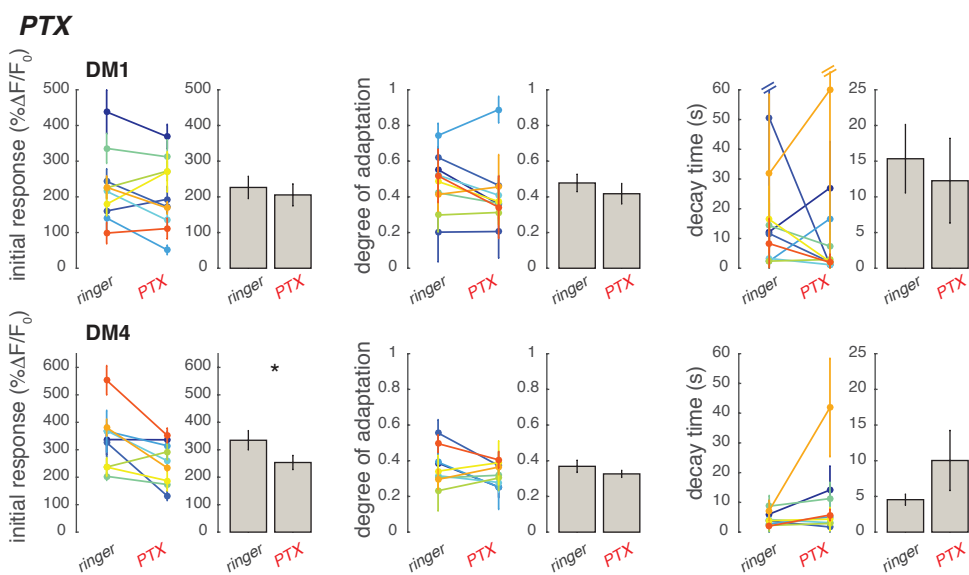

**D**

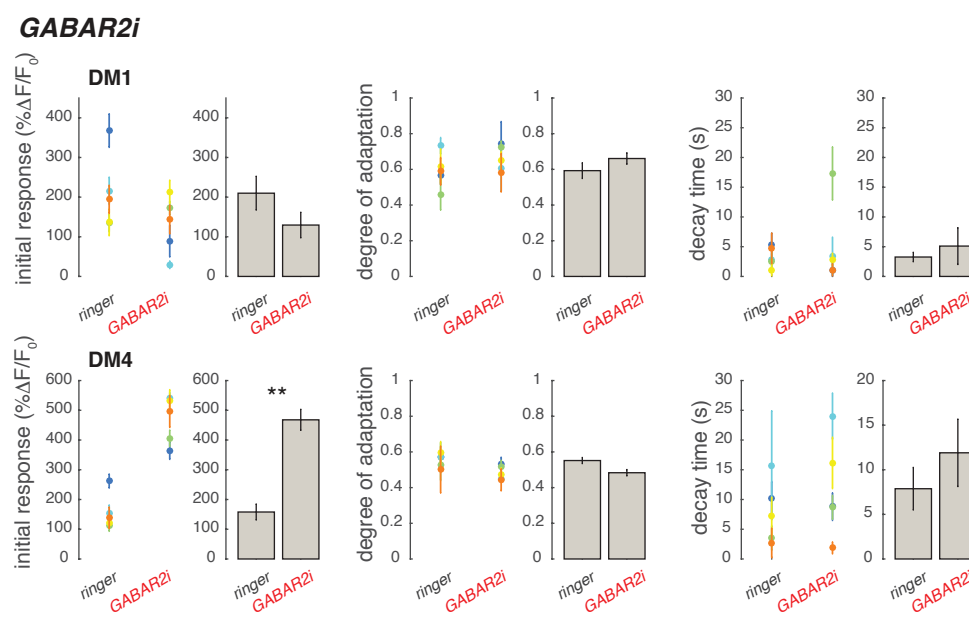

Supplement: supp [file elife-43735-supp-v1.zip]

**A***ORNs*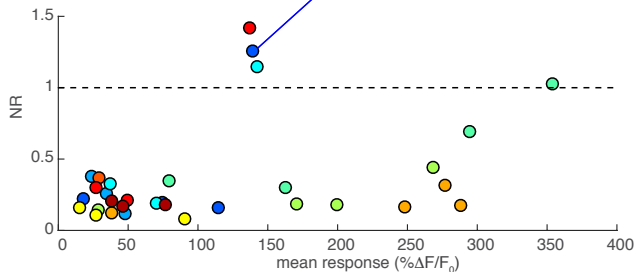**B**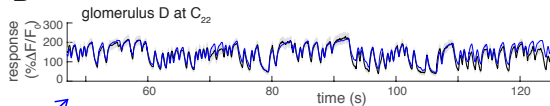**C**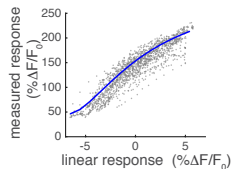**D***PNs*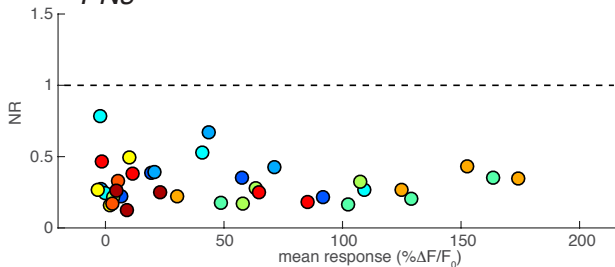

● D  
 ● DC1  
 ● DL1  
 ● DL5  
 ● DM1  
 ● DM2  
 ● DM4  
 ● DM5  
 ● DM6  
 ● VM7d

Supplement: supp [file elife-43735-supp-v1.zip]

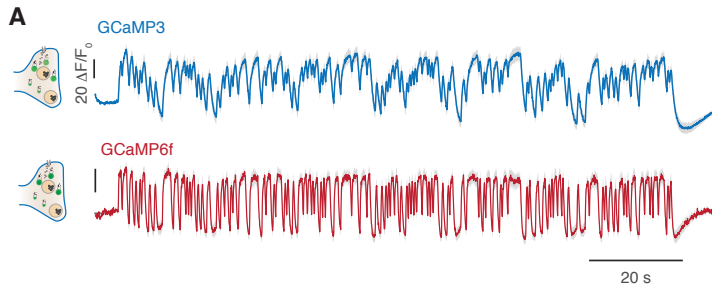

**B**

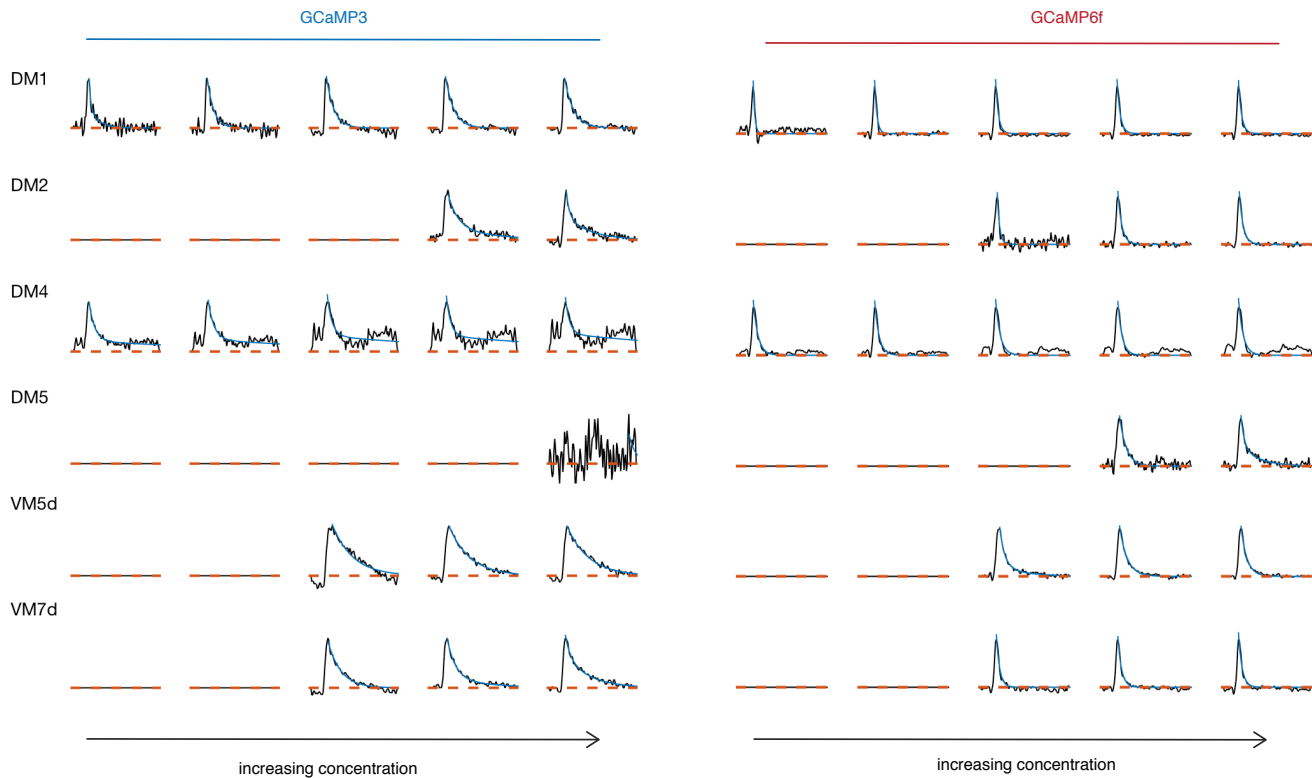

Supplement: supp [file elife-43735-supp-v1.zip]

**A**

linear filter

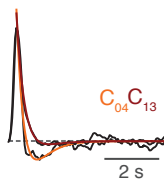**B**

static function

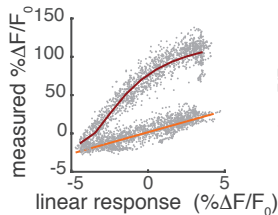**C**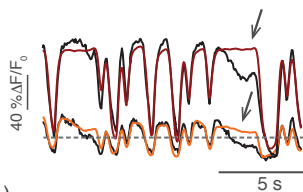**D**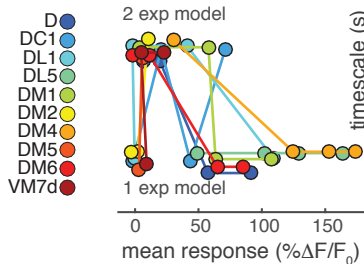**E**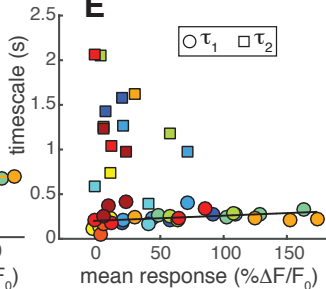

Supplement: supp [file elife-43735-supp-v1.zip]

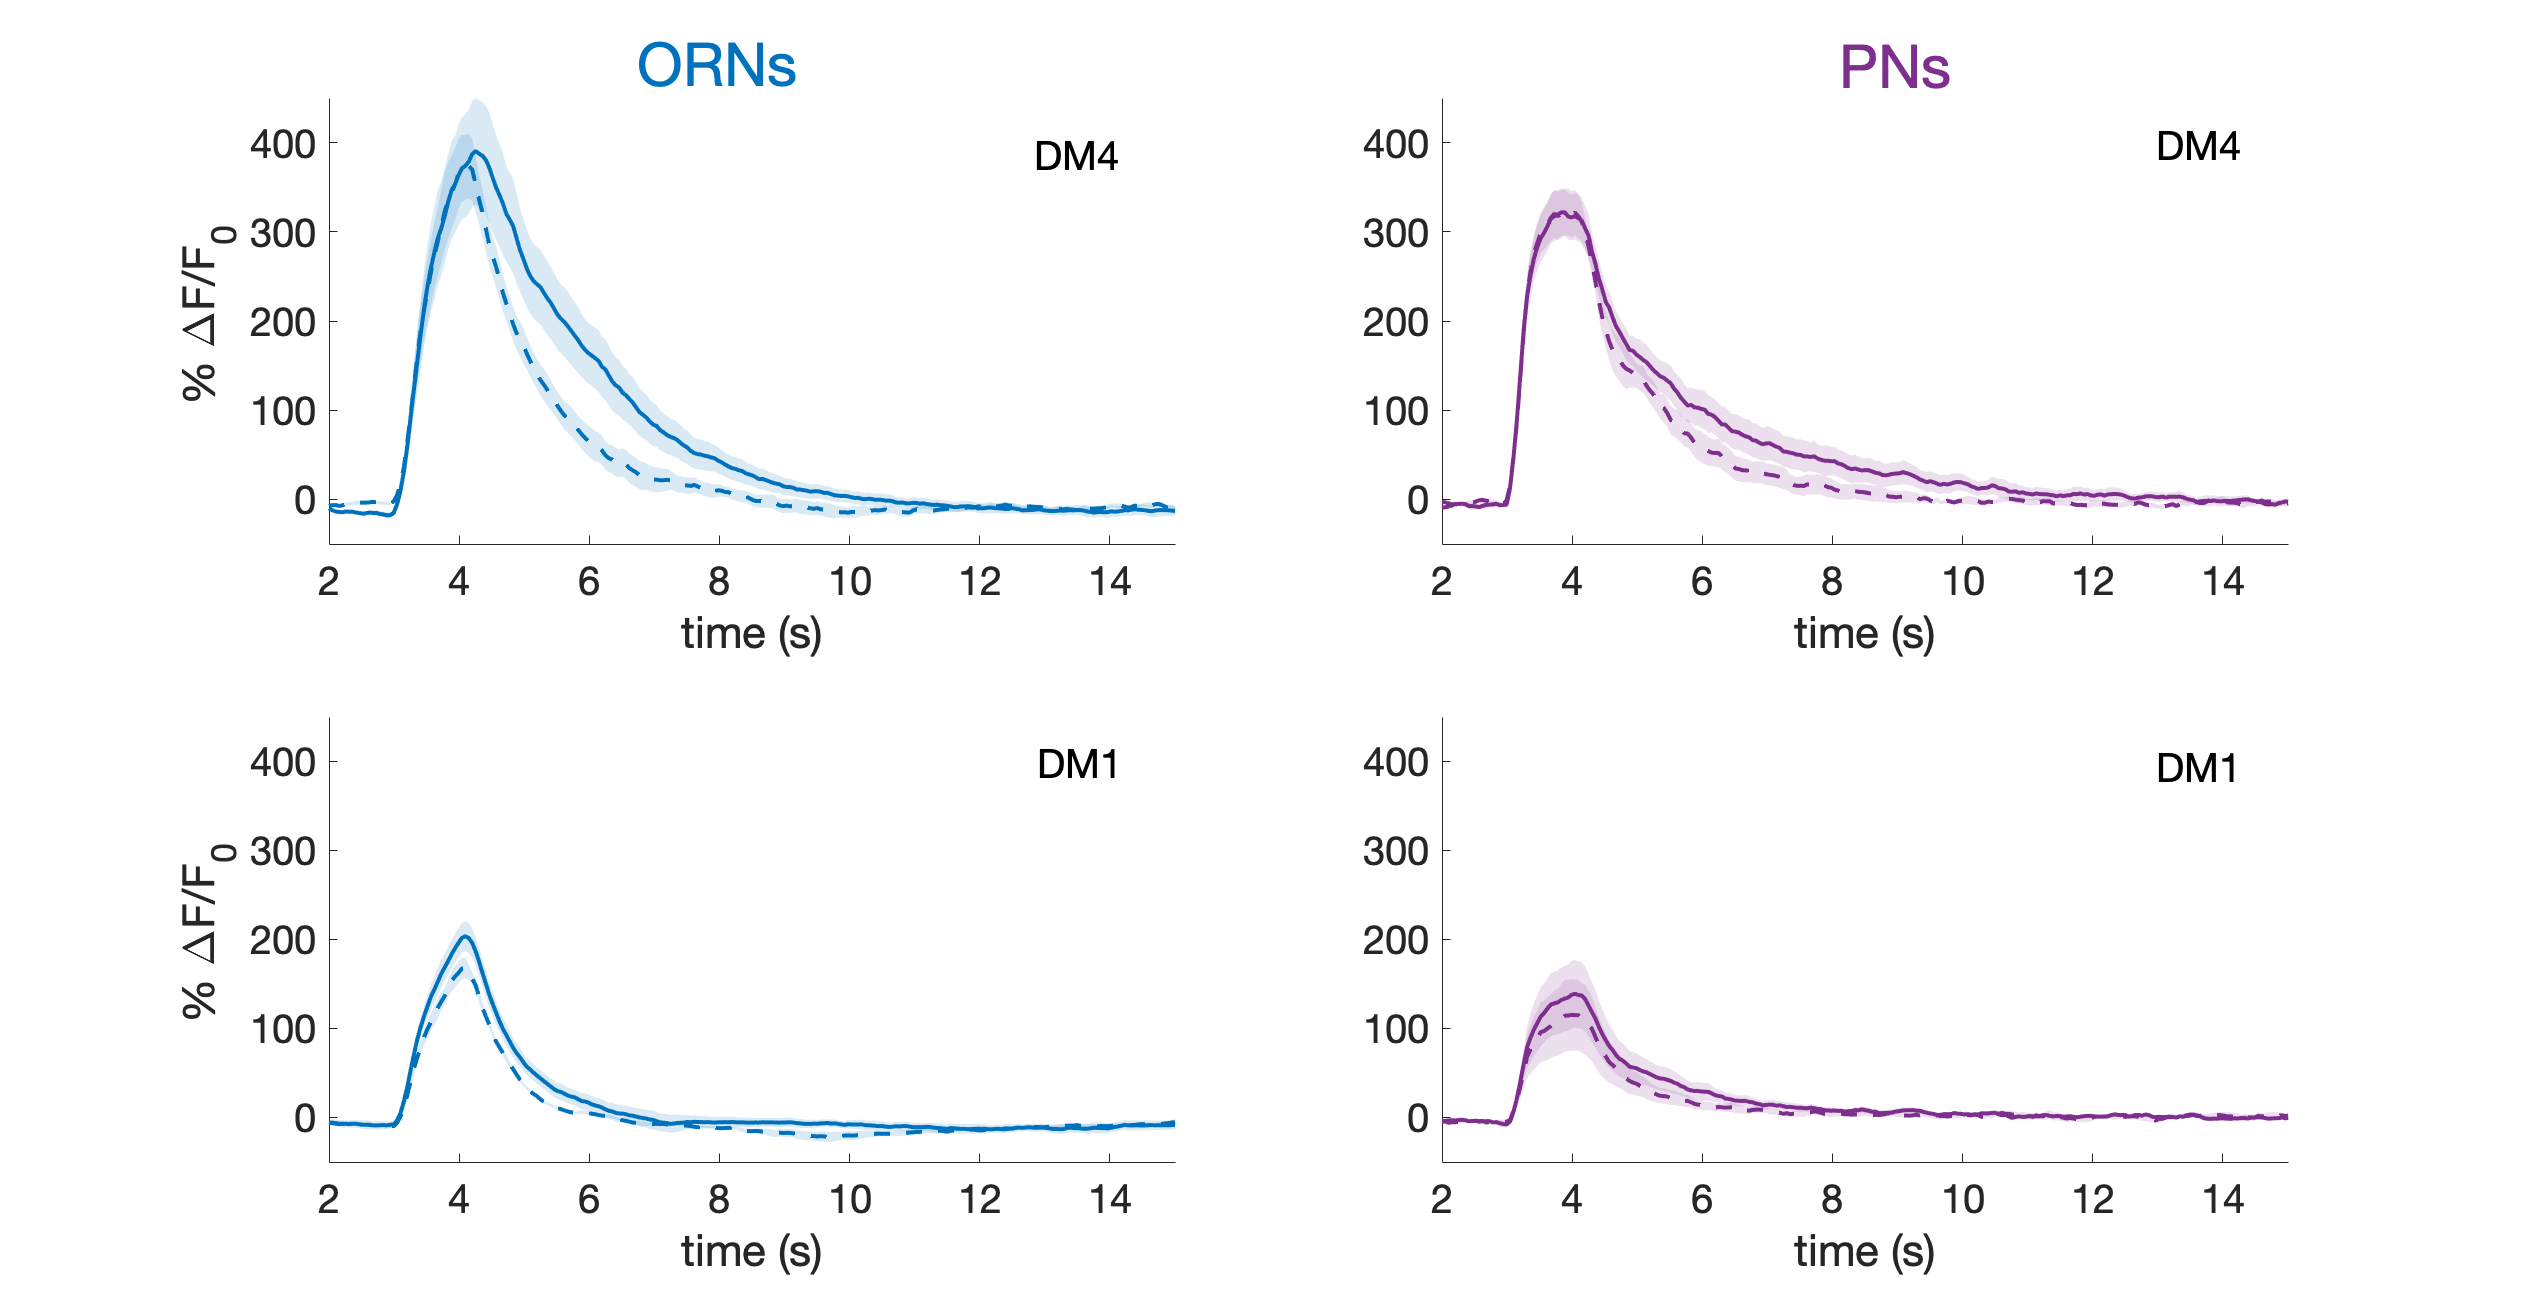

Supplement: supp [file elife-43735-supp-v2.zip › elife_poa_e43735_Figure_4_figure_supplement_1.tif]
